# Supplementary material for: Hollandite-type β-FeOOH(Cl) as a new cathode material for chloride ion batteries
Source: Royal Society of Chemistry journal article supplement (doi:10.1039/d0cc04762g), 2020-01-01
Supplement: d0cc04762g1.pdf [file d0cc04762g1.pdf]

## Electronic supplementary information

### The hollandite-type $\beta$ -FeOOH(Cl) as a new cathode material for chloride ion batteries

Guoqing Zhao, Gengping Wan, Yulin Tang, Xuefei Xu, Xuechun Zhou, Maofan Zhou, Zhen Deng, Shiwei Lin, Guizhen Wang\*

*Key Laboratory of Advanced Materials of Tropical Island Resources (Hainan University), Ministry of Education, Haikou 570228, China*

*\*Corresponding authors.*

*Tel: +86-137 0040 8893. E-mail: [wanguizhen0@hotmail.com](mailto:wanguizhen0@hotmail.com) (Guizhen Wang).*

#### Experimental section

$\beta$ -FeOOH NRs was synthesized by a simple hydrothermal method. 0.2 mol  $\text{FeCl}_3$  and 0.2 mol urea were added to 60 ml distilled water, stirring until clear. The mixed solution was transferred to a Teflon-lined autoclave and heated to 80 °C for 24 h and the obtained product was washed by ethanol and distilled water and dried at 60 °C in the oven overnight.

The  $\beta$ -FeOOH electrode was prepared by a slurry coating method. The active material  $\beta$ -FeOOH, carbon black and polyvinylidene fluoride (PVDF) binder were mixed with N-methyl-2-pyrrolidone (NMP) in the weight ratio 6:3:1. The slurry was coated on a stainless steel as current collector and vacuum dried at 80 °C for 24 h. 0.5 m 1-butyl-1-methylpyrrolidinium chloride (BpyCl) in propylene carbonate (PC) and 1-butyl-1-methylpiperidinium bis(trifluoromethylsulfonyl)imide (PP14TFSI) was used as electrolyte and Li metal as the anode electrode. The galvanostatic charge-discharge cycling and cyclic voltammograms (CV) curves were collected in the range 1.2–3.0 V.

Size distribution was tested by Zetasizer Nano S90 (4mW He-Ne,633nm) with the sample of  $\beta$ -FeOOH dispersed in water 0.001%–40% (w/w). X-ray diffraction (XRD) was used to analyze the structure and morphology of samples on a Rigaku SmartLab 3kW with Cu K $\alpha$  radiation using 40 kV working voltage and 30 mA working current. Scanning electron microscopy (SEM) images were taken by using a field emission scanning electron microscopy (FESEM, Verios G4). Transmission electron microscopy (TEM) and high-resolution TEM (HRTEM) images were captured by a JEOL JEM-2100 microscope instrument at an acceleration voltage of 200 kV. Mass contents were measured by thermal gravimetric analysis system (Q600, TA, America). The IR spectra were measured with a Bruker TENSOR27 FT-IR spectrometer with scanning 32 times and the spectral resolution was 4 cm<sup>-1</sup> for each spectrum. X-ray Photoelectron Spectrometer (XPS) were conducted by using a PHI5000 Versaprobe-II spectrometer with a monochromatic Al K $\alpha$  (1486.6 eV) source and the spectra were calibrated using carbon spectrum as a reference. The specific surface area, pore size distribution and pore volume were measured using the nitrogen adsorption-desorption technique (ASAP2460 Physisorption instrument).

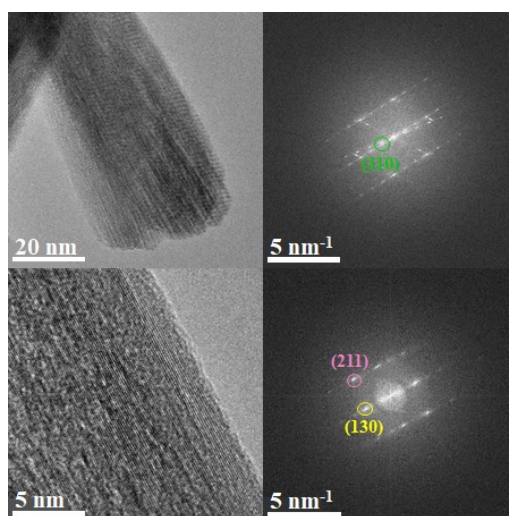

**Figure S1.** HRTEM and FFT images of  $\beta$ -FeOOH.

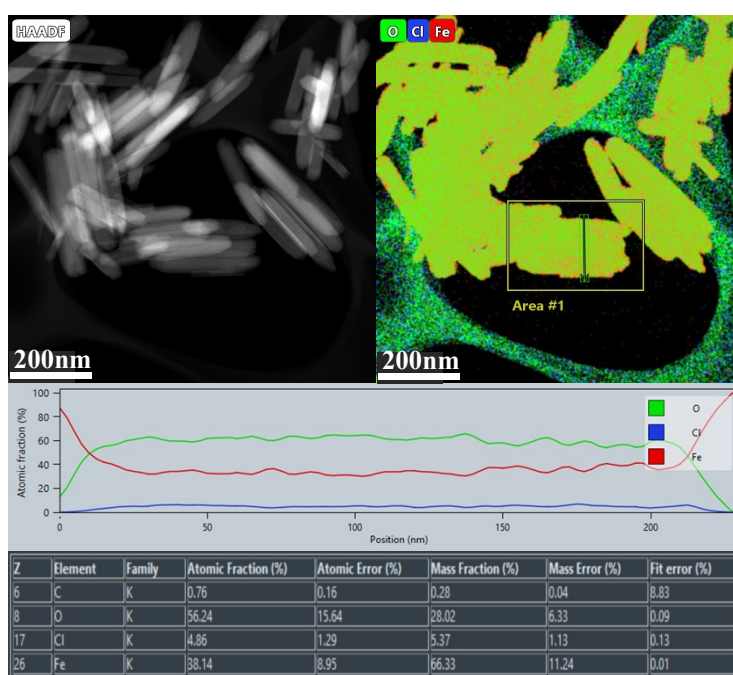

**Figure S2.** The TEM and line-scan distribution in the elements of Fe, O and Cl.

---

**Name      Mult      x      y      z      B      Occ.**

|            |    |         |         |         |         |     |
|------------|----|---------|---------|---------|---------|-----|
| <b>Fe1</b> | 8h | 0.35579 | 0.15528 | 0.00000 | 0.00000 | 1   |
| <b>O1</b>  | 8h | 0.16000 | 0.20116 | 0.00000 | 0.00000 | 1   |
| <b>O2</b>  | 8h | 0.54648 | 0.16608 | 0.00000 | 0.00000 | 1   |
| <b>O3</b>  | 4e | 0.00000 | 0.00000 | 0.45412 | 0.00000 | 0.5 |
| <b>H1</b>  | 8h | 0.21842 | 0.17307 | 0.00000 | 0.00000 | 1   |

**Rp = 1.63, Rwp = 2.12%, Rexp = 1.34,  $\chi^2 = 2.49$**

**Table S1.** Rietveld refinement results of XRD data for bare  $\beta$ -FeOOH.

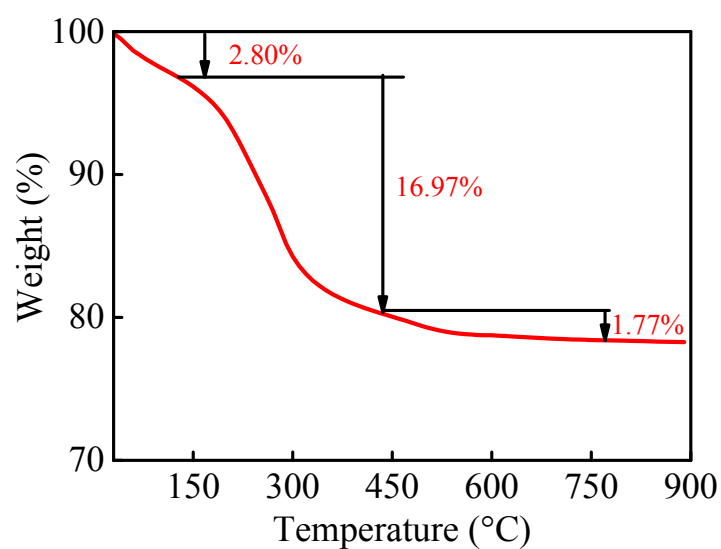

**Figure S3.** The TG curve of  $\beta$ -FeOOH.

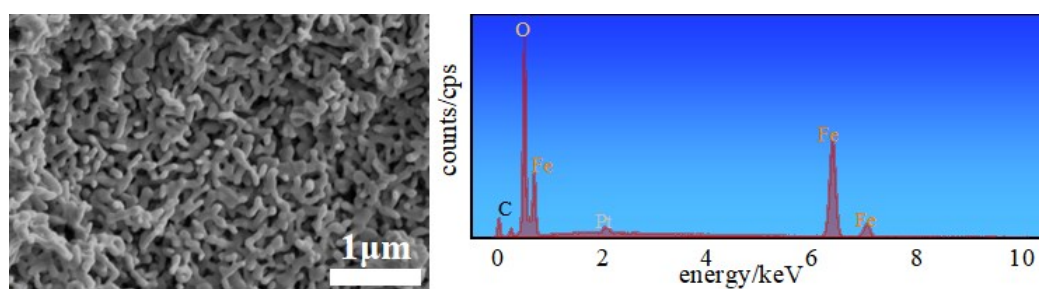

**Figure S4.** SEM image and the corresponding EDS result of  $\beta$ -FeOOH NRs after TG testing.

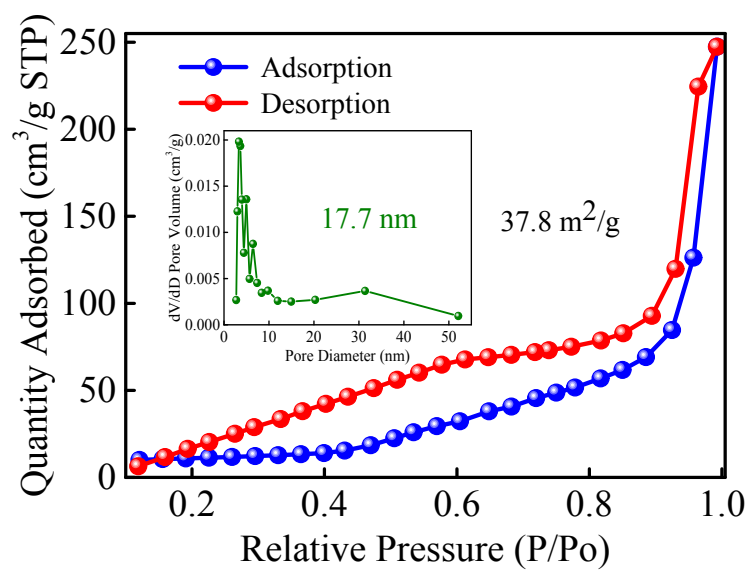

**Figure S5.** N<sub>2</sub> adsorption-desorption isotherms and pore distribution of  $\beta$ -FeOOH.

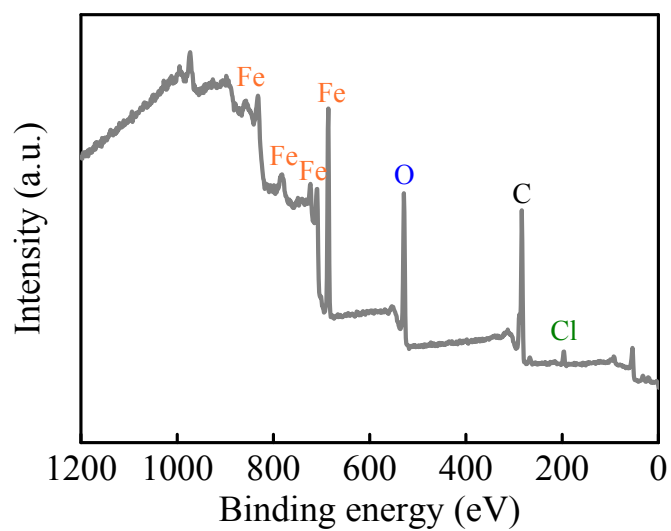

**Figure S6.** The survey XPS of  $\beta$ -FeOOH NRs.

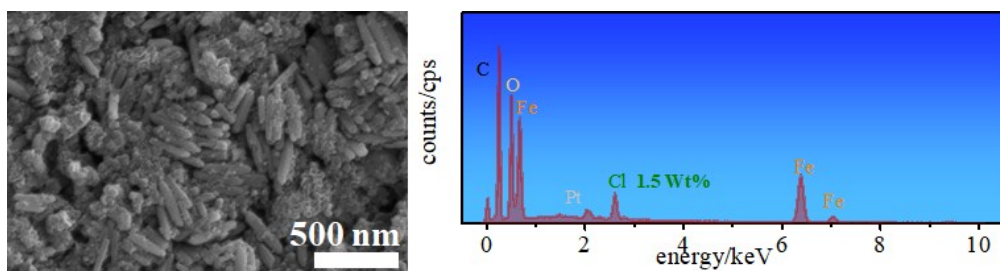

**Figure S7.** SEM image and the corresponding EDS result of  $\beta$ -FeOOH NRs after 100 cycles.

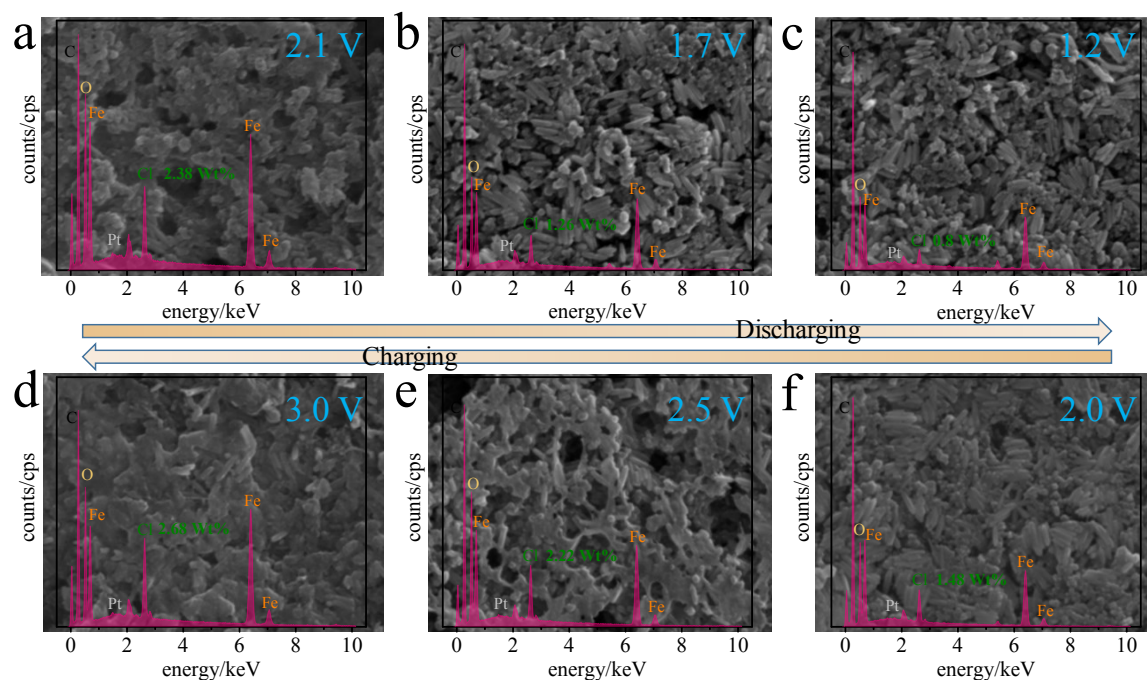

**Figure S8.** Ex situ SEM images (1  $\mu$ m) and the corresponding EDS results of  $\beta$ -FeOOH cathode during discharging and charging process.
